# Supplementary material for: Basal ganglia output reflects internally-specified movements
Source: eLife. 2016 Jul 5;5:e13833. doi: 10.7554/eLife.13833 (PMC4970866; doi:10.7554/eLife.13833)
Supplement: Supplementary file 1. — Rows correspond to individual neurons. Columns B-C show mean and standard deviation of activity during the baseline (our 'control' window, from odor port entry to reward port exit). Column D shows mean firing rates during the odor sampling epoch (i.e., delay epoch) in leftward (ipsiversive) SG trials. Column E shows p-values for paired t-tests of activity in leftward trials during the odor sampling epoch compared against baseline. Column F is similar to D, for rightward (contraversive) SG trials. Column G is similar to E, for rightward SG trials. Columns H-M are similar to B-G, for IS trials. Columns N-P show p-values for unpaired t-test comparing between SG and IS trials for baseline, odor sampling epoch in leftward trials, and odor sampling epoch in rightward trials, respectively. Column Q shows preference values calculated during the odor sampling epoch and Column R shows p-values associated with these preference values (corresponding to Figure 3C). DOI: http://dx.doi.org/10.7554/eLife.13833.011 [file elife-13833-supp1.xlsx]

## Sheet: Sheet1
Cell	Baseline	Baseline_std	L_OdorSample	P_valueL_OS	R_OdorSample	P_valueR_OS	nc_Baseline	nc_Baseline_std	nc_L_OdorSample	nc_P_valueL_OS	nc_R_OdorSample	nc_P_valueR_OS	nc_vs_c_P_valueL_BL	nc_vs_c_P_valueL_OS	nc_vs_c_P_valueR_OS	pref_OS	pval_pref_OS
tb_ML8_130613a-TT1_1	40.5714	7.59847	39.2538	0.141222	41.7619	0.203001	38.7707	7.15531	40.8991	0.467658	42.968	0.000124212	0.607335	0.288262	0.45558	0.129295	0.008
tb_ML8_130613a-TT2_1	41.7293	15.1089	49.5818	0.97236	61.2602	9.9266e-32	39.6218	13.8921	39.1687	1.21013e-11	61.2374	1.31364e-31	0.536797	3.92937e-05	0.994757	0.423371	0
tb_ML8_130613a-TT2_2	56.8059	15.5202	60.7596	0.317646	76.4301	1.80755e-23	50.6307	11.3072	50.6955	0.251482	78.7087	3.3482e-25	0.00114162	2.55513e-05	0.43634	0.612865	0
tb_ML8_130613a-TT2_3	55.106	14.6695	59.7262	0.267399	67.4344	3.9113e-17	48.9996	10.9336	50.9392	0.757943	70.2358	1.9073e-20	0.000479381	6.60445e-05	0.386985	0.363376	0
tb_ML8_130613a-TT2_4	26.7413	7.75013	27.0004	0.185664	39.7077	5.95364e-24	23.861	6.29088	23.2064	0.00840005	37.0395	4.1953e-19	0.02263	0.00364726	0.136294	0.67545	0
tb_ML8_130613a-TT3_1	51.6215	11.4735	50.4072	0.32776	63.3542	2.1364e-09	51.5385	10.9951	44.8282	0.487879	74.4734	6.97599e-15	0.026952	0.0160913	4.38139e-06	0.646748	0
tb_ML8_130613a-TT3_2	51.7726	13.7569	53.1848	0.972544	67.0101	2.19101e-15	45.0782	12.3623	43.1624	0.195052	65.4793	7.81295e-16	0.000198725	6.42062e-06	0.608275	0.574755	0
tb_ML8_130613a-TT3_3	54.2775	10.3828	51.0635	0.0159672	60.7019	2.0777e-05	52.6245	8.33943	46.6534	0.0531993	68.8569	5.65488e-14	0.00100047	0.0258629	0.000188232	0.564392	0
tb_ML8_130613a-TT4_1	46.0582	9.91213	34.162	5.85696e-39	32.237	2.32222e-14	46.9469	8.91718	37.6597	1.48852e-15	32.4562	3.60622e-11	0.36658	0.0151947	0.901026	-0.167337	0.004
tb_ML8_130614a-TT1_1	91.6681	20.5669	79.6025	2.71349e-43	91.4833	0.00091035	95.6156	13.0642	78.5159	1.53672e-13	107.067	9.8505e-05	0.79853	0.696478	1.90351e-06	0.444522	0
tb_ML8_130614a-TT1_2	103.015	29.0897	106.852	0.209555	110.527	2.77992e-16	126.022	17.0173	120.357	0.097303	153.746	2.0657e-15	0.00335837	0.0011794	8.70036e-17	0.261071	0
tb_ML8_130614a-TT2_1	36.9167	14.4762	46.5194	0.126187	47.5414	7.85286e-33	32.1336	10.6208	37.3557	0.0398241	57.9916	1.52719e-28	3.97513e-05	0.00150454	0.00316579	0.166147	0
tb_ML8_130614a-TT2_2	45.3626	14.6388	54.134	2.69072e-14	56.3722	6.48497e-29	45.8807	6.98797	55.8169	1.6466e-08	63.9775	1.0346e-21	0.970395	0.525484	0.011195	0.172093	0
tb_ML8_130614a-TT2_4	111.546	22.1863	133.758	1.91853e-19	139.808	5.27048e-46	111.029	14.4515	132.754	3.90673e-08	160.461	2.52141e-32	0.661545	0.776845	1.04175e-05	0.288318	0
tb_ML8_130614a-TT4_1	47.7633	20.1952	56.8915	2.31516e-13	57.7114	1.34234e-22	53.2097	6.98353	63.8832	2.21611e-10	70.7861	1.60355e-19	0.228074	0.0576246	0.000482898	0.0941857	0.04
tb_ML8_130614a-TT4_2	59.7389	12.4007	53.3647	6.08822e-50	51.051	0.354501	59.3288	7.27092	57.4077	9.35498e-05	55.2946	0.578264	0.0859635	0.0167862	0.0169358	-0.0953748	0.058
tb_ML8_130617a-TT2_2	15.057	6.70502	16.7865	0.0107636	13.0323	2.57308e-08	9.69311	4.49744	11.3201	5.3271e-05	11.2713	2.08808e-17	3.06671e-07	1.53916e-05	0.123427	-0.217427	0
tb_ML8_130617a-TT2_3	62.518	11.106	73.6045	1.11064e-14	72.4228	1.58888e-14	55.9953	8.61313	74.2803	5.72413e-14	79.3407	1.71278e-16	1.58259e-08	0.771349	0.00465572	0.0843623	0.072
tb_ML8_130617a-TT2_4	71.3664	23.6329	86.723	1.05281e-05	83.9741	5.82563e-16	72.8698	16.1113	82.4832	0.335117	119.984	1.19674e-23	0.103262	0.364513	2.45248e-08	0.159919	0.006
tb_ML8_130617a-TT3_2	113.685	17.9692	117.718	0.151461	112.745	0.541887	106.467	14.0278	134.924	2.86211e-08	116.535	1.14357e-06	0.515908	1.63859e-05	0.429556	-0.16288	0.006
tb_ML8_130617a-TT4_1	53.9121	12.7892	42.7214	1.49748e-37	40.9108	1.24541e-08	64.0118	10.8014	52.1117	4.4184e-16	47.7727	2.02126e-11	5.80395e-10	5.12109e-08	0.000139426	-0.0677126	0.134
tb_ML8_130618a-TT2_1	125.714	13.505	129.305	0.00644301	138.113	4.89412e-14	122.813	15.0071	121.484	2.52657e-05	138.842	5.38485e-16	0.170616	0.00538031	0.818393	0.387544	0
tb_ML8_130618a-TT2_2	115.936	20.3772	140.257	3.90267e-05	151.562	5.33043e-27	108.354	18.5335	123.141	0.359412	163.991	2.51094e-33	0.000541845	1.12878e-05	0.00839238	0.512521	0
tb_ML8_130618a-TT3_1	86.1382	13.8886	98.0761	0.000171668	96.557	5.918e-11	83.1585	15.3654	102.054	4.65755e-06	96.4273	6.85755e-12	0.554511	0.284854	0.968788	-0.107572	0.072
tb_ML8_130618a-TT3_2	94.3989	10.9389	94.321	0.407223	99.6852	0.000374943	89.6029	10.1689	87.4904	0.437008	106.136	1.01993e-12	0.000453282	0.00941929	0.0125063	0.398437	0
tb_ML8_130618a-TT4_1	100.651	16.0721	97.1309	2.75456e-08	108.889	3.7365e-13	91.7475	15.6589	82.4302	3.36481e-12	108.782	1.25847e-21	0.00105287	7.58505e-08	0.968524	0.602688	0
tb_ML8_130618a-TT4_2	70.2459	8.43448	77.5984	0.00193556	81.5749	1.38459e-15	67.6695	8.63861	71.6838	0.104849	85.8955	8.37984e-21	0.0827235	0.010811	0.0359607	0.385235	0
tb_ML8_130619a-TT1_1	73.9864	14.5282	62.1606	2.43285e-39	65.6828	0.569116	71.0064	12.0012	61.4983	6.76415e-12	71.7256	0.0013722	0.0357023	0.753003	0.00685636	0.252241	0
tb_ML8_130619a-TT1_2	128.174	25.6584	134.756	0.239647	148.418	6.9203e-18	140.574	30.3016	173.18	0.000293288	149.686	4.64688e-18	1.87979e-17	5.01204e-17	0.811453	0.023374	0.364
tb_ML8_130619a-TT2_1	93.7243	13.3008	108.462	1.83525e-16	119.85	2.46236e-19	93.338	11.4064	117.811	8.02132e-15	105.756	5.93572e-09	0.311303	0.00136349	0.000204116	0.0860434	0.066
tb_ML8_130619a-TT2_2	16.9413	3.53373	19.8378	1.62825e-06	16.5391	0.00238246	14.9567	2.65591	20.334	1.04817e-11	13.2735	0.436791	1.41684e-06	0.535362	0.000326431	-0.470841	0
tb_ML8_130619a-TT3_1	63.7057	11.1124	52.2589	4.3021e-35	60.8814	0.57429	59.9483	10.3964	54.0294	1.48521e-10	65.7303	6.56065e-08	0.290196	0.314715	0.0394572	0.392824	0
tb_ML8_130619a-TT3_2	52.041	9.70046	84.9725	1.0297e-51	82.5452	3.25732e-23	56.3593	9.52102	101.361	6.40635e-23	74.6002	1.10774e-09	1.82585e-06	6.73617e-06	0.101721	-0.219408	0
tb_ML8_130619a-TT3_3	85.8495	11.7288	93.8736	4.53394e-08	102.791	2.38803e-16	84.046	13.5988	103.98	4.77098e-12	98.108	7.52705e-14	0.211762	3.05952e-05	0.187398	0.113639	0.036
tb_ML8_130619a-TT3_4	136.795	18.7317	176.969	1.39132e-38	183.404	2.68857e-22	139.236	21.6644	202.777	8.27929e-21	170.664	4.78665e-13	0.0011357	7.51763e-07	0.097081	-0.0949291	0.074
tb_ML8_130619a-TT4_1	49.7206	8.76068	48.5893	2.19528e-13	57.5639	5.80438e-28	47.1252	8.4729	46.2197	6.40255e-08	60.6169	5.58146e-22	0.175986	0.0889905	0.0764512	0.571659	0
tb_ML8_130619a-TT4_2	38.791	9.9452	28.7906	1.36654e-27	33.154	4.60581e-08	35.6569	9.32083	26.8431	5.8938e-19	31.8249	0.439623	0.60803	0.106989	0.404099	0.254195	0
tb_ML8_130620a-TT2_1	16.5675	5.06616	14.9427	9.07768e-12	16.2497	0.00540107	17.014	5.00976	16.9822	6.46027e-06	15.3824	0.0110397	0.000373413	0.0308614	0.404426	0.0399539	0.252
tb_ML8_130620a-TT2_2	71.0334	11.0498	96.4875	4.98267e-32	93.0646	2.31161e-25	68.6292	9.49404	108.188	2.19089e-22	87.7152	1.41834e-12	0.717182	0.000661015	0.151735	-0.222222	0.002
tb_ML8_130620a-TT3_1	87.2189	20.7599	142.499	4.47984e-45	128.734	2.11972e-30	80.1114	19.1176	151.732	1.02833e-20	117.562	4.28879e-24	0.572394	0.0804057	0.0308088	-0.34188	0
tb_ML8_130620a-TT4_1	52.0559	9.01389	52.0075	0.523398	54.4521	0.201527	47.8883	8.1087	53.5036	0.00645761	57.1553	1.82267e-10	0.170262	0.51196	0.205635	0.128612	0.008
tb_ML8_130621a-TT1_1	38.8666	7.14675	43.3612	6.01907e-07	45.8153	5.02734e-16	37.7178	6.51611	40.0643	0.452615	45.856	3.17424e-12	0.334383	0.0613709	0.979474	0.16511	0.004
tb_ML8_130621a-TT1_2	35.4888	11.1484	32.5178	0.0846622	39.1527	0.900157	35.8287	11.9527	26.8123	0.803534	44.5105	0.0400017	0.0327628	0.00671486	0.00504498	0.501541	0
tb_ML8_130621a-TT2_1	48.3849	12.1081	48.3326	0.240511	59.742	5.14877e-19	49.9885	8.00488	51.3896	0.0198409	68.0852	1.20651e-14	0.612887	0.172099	0.000770677	0.468308	0
tb_ML8_130621a-TT2_2	39.5808	13.9799	41.1815	1.98061e-06	59.171	5.29171e-09	35.5794	9.89526	47.8055	1.98959e-10	53.8806	1.2426e-06	0.173866	0.0405235	0.254119	0.270034	0
tb_ML8_130621a-TT3_1	109.351	22.5674	115.562	4.3182e-23	128.914	1.85906e-14	117.396	11.0933	125.952	1.38412e-09	140.797	1.06291e-15	0.000234325	0.00708652	0.000145493	0.364658	0
tb_ML8_130621a-TT4_1	40.8605	8.46008	38.0426	2.27142e-06	42.0088	0.0596892	40.757	7.20484	37.0999	5.50096e-05	45.9276	2.88011e-05	0.95992	0.564762	0.00861794	0.316893	0
tb_ML8_130621a-TT4_2	45.9221	12.9588	48.3472	7.84455e-15	59.2984	1.31453e-21	50.7103	7.48405	56.0179	1.39481e-08	64.7572	3.35922e-17	0.000444352	0.00155044	0.00642631	0.429966	0
tb_ML8_130624a-TT1_1	67.3852	9.81738	65.7026	0.340639	82.1254	1.02052e-12	62.798	7.45689	68.9717	7.84085e-10	82.1536	2.15872e-13	2.39969e-06	0.122084	0.99081	0.572847	0
tb_ML8_130624a-TT2_1	128.721	15.7234	112.774	1.04272e-11	135.425	0.00569182	123.357	14.9486	107.817	1.58807e-06	148.706	2.30557e-08	0.000448154	0.164026	0.00204712	0.607225	0
tb_ML8_130624a-TT3_1	70.8854	10.189	80.0813	7.96372e-08	92.3338	4.63381e-18	70.6945	8.29377	93.9399	1.73963e-13	107.044	3.06542e-17	0.467366	1.42493e-06	0.000333871	0.322638	0
tb_ML8_130624a-TT3_2	63.4196	13.1697	65.3422	0.120961	73.7245	1.54333e-13	57.9521	11.6532	58.4628	9.05144e-05	70.4066	8.2136e-06	1.17131e-06	0.00980819	0.218999	0.359744	0
tb_ML8_130624a-TT4_1	16.9908	8.24427	15.4159	3.91915e-20	14.6045	6.33207e-06	20.1149	7.34336	16.9486	8.65051e-21	12.4666	0.430529	8.03565e-06	0.219161	0.144858	-0.192077	0.002
tb_ML8_130624a-TT4_2	41.8565	9.09538	45.1452	5.10575e-05	50.565	1.60701e-14	38.8142	9.50517	40.9921	1.21e-07	50.8178	1.49768e-07	1.44894e-05	0.0170295	0.901438	0.361017	0
tb_ML8_130625a-TT1_1	41.7868	13.8807	49.8434	7.53361e-15	46.812	0.0256577	37.1129	5.76391	62.8014	1.22805e-20	20.0793	3.13992e-27	0.487965	0.000287128	9.41149e-12	-0.422352	0
tb_ML8_130625a-TT1_2	28.5969	5.21256	22.3499	1.22258e-10	23.8656	1.55423e-06	25.327	3.72815	21.3519	1.07044e-06	19.3681	1.4033e-08	0.0186883	0.412886	0.000332839	0.0016165	0.488
tb_ML8_130625a-TT2_1	75.5287	25.9063	108.808	1.10362e-15	137.763	4.46735e-21	58.568	9.81935	93.7161	1.20647e-19	117.099	6.5624e-21	3.91992e-05	0.0227919	0.00688347	0.389632	0
tb_ML8_130625a-TT3_1	14.6946	3.17162	12.6047	0.0192397	16.232	0.471913	13.8905	2.99311	12.1858	0.466881	17.0661	0.068828	0.000121026	0.5962	0.365767	0.437904	0
tb_ML8_130625a-TT3_2	113.9	33.9901	200.738	2.13792e-31	181.679	1.29825e-23	90.0936	16.6674	196.722	4.43582e-26	191.915	3.79079e-24	6.88665e-05	0.648005	0.241552	-0.151839	0.008
tb_ML8_130625a-TT4_1	8.01948	3.10833	6.74682	0.069306	8.4991	5.66344e-06	7.08933	3.02742	6.61179	6.11747e-07	7.89778	0.000268682	1.36342e-05	0.819623	0.330709	0.259086	0
tb_ML8_130625a-TT4_2	12.9148	6.03945	12.1784	1.06441e-09	11.6745	7.23551e-06	12.0089	4.91906	10.5189	3.50491e-12	13.113	2.29661e-10	0.625372	0.0586094	0.206015	0.0155518	0.398
tb_ML8_130626a-TT1_1	70.7794	10.1095	73.0702	0.000920747	71.1745	0.356554	62.235	6.81274	84.8771	5.3628e-17	60.1896	0.442718	5.09503e-05	1.68895e-06	1.90351e-06	-0.318131	0
tb_ML8_130626a-TT2_1	43.1021	10.6054	53.5464	1.30833e-10	66.7787	1.75722e-38	34.2884	7.29476	49.5718	1.00737e-15	67.9853	4.00131e-24	2.22372e-11	0.104873	0.620717	0.551866	0
tb_ML8_130626a-TT3_1	61.7633	10.4658	80.4284	2.13074e-24	76.8367	3.19605e-30	51.9485	6.9551	73.6333	4.45832e-16	75.8988	9.31172e-20	7.28907e-14	0.00481634	0.708431	-0.0823937	0.078
tb_ML8_130626a-TT4_1	38.6171	19.0344	44.8185	1.41253e-21	54.0268	1.71425e-24	41.4419	8.99889	55.6795	1.59179e-21	62.0214	3.83309e-19	0.43115	0.00159571	0.0143936	0.257132	0
tb_ML8_130626a-TT4_2	4.32252	2.35808	5.93674	0.0180371	5.30942	1.02025e-12	3.18039	1.1942	4.35026	0.00262176	5.68292	1.87412e-11	8.03095e-07	0.00311658	0.508814	-0.0120081	0.45
tb_ML8_130627a-TT1_2	44.6087	11.3886	48.3745	5.45549e-06	45.372	0.906709	36.2367	4.8937	47.3557	3.16018e-16	36.5558	0.512395	2.96692e-07	0.652507	0.000169081	-0.273429	0
tb_ML8_130627a-TT2_1	21.1478	5.90995	22.1656	0.395128	24.8481	2.69958e-15	16.3242	3.67306	16.6939	0.694875	24.7356	2.41437e-12	2.25794e-11	9.50956e-08	0.926329	0.305955	0
tb_ML8_130627a-TT2_2	5.9235	4.42438	4.93336	4.56892e-11	4.49	0.0549853	7.32342	3.93128	5.7786	6.68691e-08	6.40617	0.838285	0.0338274	0.210157	0.00415387	0.0270208	0.348
tb_ML8_130627a-TT3_1	54.1574	8.81338	55.4534	0.385236	53.1121	0.0231172	46.1753	5.23596	40.8267	1.16636e-05	51.6107	0.000482444	2.31897e-13	3.5831e-14	0.495477	0.0184842	0.392
tb_ML8_130627a-TT3_2	66.5652	20.0033	135.593	4.28393e-60	145.517	3.4205e-40	58.0545	12.9785	156.21	1.88042e-27	174.283	2.80187e-27	0.219375	0.000864598	0.000104573	0.171039	0.002
tb_ML8_130627a-TT4_1	83.2911	13.3407	90.8862	0.000123275	91.757	1.8661e-21	68.7555	8.23321	74.2106	0.00849717	92.7219	4.17096e-23	3.6752e-15	7.04738e-14	0.662859	0.199651	0
tb_ML8_130627a-TT4_2	15.9229	5.29349	13.8511	1.28675e-25	15.4939	5.28782e-08	12.7484	3.10085	8.6837	2.61629e-18	17.9481	1.92365e-11	1.63921e-06	3.60232e-10	0.0172128	0.348133	0
tb_ML8_130703a-TT1_1	19.4045	6.32201	24.0056	8.99105e-20	20.8988	0.00131393	15.2463	4.38665	21.6418	2.12988e-17	15.0282	0.00955353	0.000255912	0.0973905	7.84514e-06	-0.280873	0
tb_ML8_130703a-TT1_2	23.5705	5.54866	19.4523	6.61033e-05	18.2903	7.27762e-19	21.7287	5.23065	18.5949	0.00109893	14.8303	6.66968e-19	0.107331	0.376253	0.000244975	-0.194792	0.002
tb_ML8_130703a-TT2_1	22.9805	4.909	22.5049	0.149877	20.9131	0.0608209	22.6995	5.86167	23.5444	0.222431	18.6236	0.106507	0.181765	0.341619	0.0340988	-0.23411	0
tb_ML8_130703a-TT2_2	33.9409	14.8017	34.0582	0.274147	34.8663	0.731427	45.526	17.9603	41.1903	0.484741	46.2357	0.000148786	0.000564789	0.00780714	1.34628e-06	0.184559	0.002
tb_ML8_130703a-TT2_3	43.8915	16.0677	46.283	3.21642e-16	50.4111	6.98508e-09	43.5761	16.008	45.8747	2.21963e-20	52.9728	0.000768634	0.240769	0.85086	0.278196	0.195379	0.002
tb_ML8_130703a-TT3_1	57.0877	14.4007	59.5038	2.91885e-11	56.5738	6.18088e-08	48.3513	12.8153	54.9091	4.26819e-09	41.8573	8.47908e-13	0.000912769	0.10922	4.41015e-09	-0.225014	0
tb_ML8_130704a-TT1_1	59.216	15.8147	68.405	3.61436e-30	69.7765	1.86484e-06	64.9187	12.4885	83.9267	3.71378e-20	74.2729	0.886738	0.0396048	6.23211e-06	0.107376	-0.0578392	0.186
tb_ML8_130704a-TT2_1	54.4944	16.0225	67.7439	0.196877	64.3686	1.11925e-52	59.9824	17.6718	74.4444	0.603268	62.3465	6.95648e-17	0.000680118	0.0012272	0.376865	-0.255548	0
tb_ML8_130704a-TT3_1	90.4598	15.6916	89.5489	4.43744e-07	85.7871	3.54175e-21	95.7819	12.8914	100.86	3.34588e-10	90.0852	7.07321e-15	0.0393722	0.0018276	0.125662	-0.174338	0
tb_ML8_130704a-TT4_1	50.5703	11.8905	58.1259	5.2001e-20	57.8155	3.77593e-09	54.2513	8.84833	66.1322	9.73712e-16	66.7985	5.14676e-07	0.264058	0.0014071	6.70987e-05	-0.0115576	0.462
tb_ML8_130705a-TT1_1	22.123	4.53268	28.3574	4.77386e-20	22.9608	0.0166746	21.9893	3.51563	39.3441	1.01015e-18	19.991	0.989412	0.0267556	9.29156e-13	0.00178982	-0.564289	0
tb_ML8_130705a-TT1_2	12.9093	6.72803	10.2457	0.34464	14.8976	0.0163559	12.1301	3.4319	10.783	0.00111289	13.2164	0.00780696	0.183854	0.55894	0.152071	0.353896	0
tb_ML8_130705a-TT2_1	13.179	8.80505	11.5634	0.00385724	14.8697	0.150684	12.1017	2.68505	9.68977	5.37724e-05	13.3775	0.0920154	0.521055	0.130519	0.333326	0.267721	0
tb_ML8_130705a-TT3_1	10.0863	9.74021	7.95457	1.94833e-10	12.5271	9.39947e-10	8.0298	3.84385	6.57278	1.00362e-13	7.94442	1.90325e-07	0.986244	0.245829	0.00341713	0.291341	0
tb_ML8_130705a-TT4_1	49.3234	22.5297	38.7162	0.529128	54.6199	2.95136e-09	51.1177	12.6922	39.2408	0.0852507	54.6143	8.92964e-05	0.520061	0.845299	0.998722	0.483704	0
tb_ML7_130724a-TT1_1	19.3219	7.32841	43.3326	2.34383e-60	30.7843	2.63178e-47	20.808	7.62528	50.3319	7.71565e-28	31.4183	1.96911e-21	0.000113511	0.000493782	0.718094	-0.552892	0
tb_ML7_130724a-TT2_1	19.1085	6.81982	45.8323	4.19894e-67	33.4159	1.02416e-53	18.2426	6.99807	47.7557	6.60441e-31	29.5183	5.22388e-23	0.137213	0.337418	0.0223722	-0.561611	0
tb_ML7_130724a-TT3_1	51.1002	8.01885	75.7838	1.29488e-47	62.8569	2.43321e-25	46.6789	8.87727	80.189	7.26503e-25	56.8711	1.07007e-12	0.491674	0.0932593	0.00696718	-0.485607	0
tb_ML7_130724a-TT3_2	61.7963	21.9793	38.9498	5.45237e-27	39.7388	1.18489e-59	51.8992	15.6527	41.0632	0.784474	34.176	9.25417e-21	4.84457e-09	0.141796	0.00273169	-0.0908444	0.038
tb_ML7_130724a-TT4_1	16.3797	6.94824	40.1202	5.56874e-62	27.7081	9.06069e-46	16.6377	6.67516	45.3434	5.78561e-30	27.0763	1.7782e-22	0.0186929	0.00970548	0.718718	-0.550476	0
tb_ML7_130724a-TT4_2	18.2826	5.32698	33.7784	6.94687e-36	27.4281	2.50476e-39	16.0998	5.25206	25.9626	1.31606e-12	19.9224	3.60523e-16	0.27278	3.28734e-05	1.00142e-05	-0.267289	0
tb_ML7_130724a-TT4_3	18.686	4.50921	22.0443	9.26828e-07	23.2629	2.13412e-32	19.8739	3.85987	21.0453	0.00836685	22.4174	3.07953e-11	0.000150298	0.250517	0.451818	0.105337	0.026
tb_ML7_130729a-TT3_1	11.8623	3.10563	14.3705	0.00921267	13.9116	9.41257e-08	11.2942	2.90408	13.0745	6.19785e-05	14.4441	7.21301e-06	0.00650376	0.110981	0.508629	0.0516586	0.254
tb_ML7_130729a-TT3_2	83.5801	19.8424	76.9454	0.0923528	70.8465	4.90384e-07	86.5397	12.9592	92.767	0.000370429	81.0176	0.00186194	0.120018	1.07534e-05	0.00056552	-0.328287	0
tb_ML7_130729a-TT4_1	47.1874	20.5448	51.8205	5.05885e-09	70.0827	1.46939e-25	57.0146	18.2324	74.374	0.0384751	74.813	1.00195e-18	0.553215	4.44208e-07	0.243431	0.154443	0.02
tb_ML7_130729a-TT4_2	15.6997	4.16797	18.0927	0.0169026	18.2826	2.20375e-05	15.3535	3.67227	16.3496	0.000971072	18.0287	0.0801979	0.0404151	0.132376	0.803157	0.124011	0.036
tb_ML7_130730a-TT1_1	73.3389	13.1169	62.9588	2.99974e-10	82.0891	9.69767e-07	63.6273	11.8677	57.3743	5.92584e-05	73.4411	5.71096e-08	1.04e-08	0.0975682	0.0191723	0.472485	0
tb_ML7_130730a-TT1_2	10.6027	6.46567	8.63505	0.00558083	12.2192	0.00826333	7.4531	5.80055	3.09002	0.0740996	12.7248	0.00581765	2.37812e-07	2.91612e-05	0.696429	0.61553	0
tb_ML7_130730a-TT3_1	133.86	15.5816	130.837	0.0310755	133.353	0.704811	138.198	16.1787	146.325	0.785679	131.751	0.381912	7.03204e-06	1.9232e-06	0.562333	-0.164427	0.008
tb_ML7_130730a-TT4_1	23.7327	5.12524	27.2649	1.40643e-10	25.4161	0.269739	25.0206	4.62124	26.8243	3.92217e-06	24.5006	0.000328738	0.0114525	0.760626	0.423691	-0.138543	0.03
tb_ML7_130731a-TT2_1	22.644	5.91284	27.5634	9.26799e-05	26.8366	1.7162e-11	20.605	5.14931	26.4627	6.83328e-09	32.5593	1.20466e-13	1.13557e-06	0.50495	0.00013766	0.0879145	0.08
tb_ML7_130731a-TT3_1	37.7888	11.2471	61.7825	8.80692e-10	53.6855	3.45135e-20	42.4831	13.264	98.6332	2.90135e-12	62.5663	9.97374e-15	0.00382061	3.3669e-07	0.0209596	-0.242765	0
tb_ML7_130731a-TT4_1	46.7063	11.5032	56.4123	2.56086e-08	52.6364	2.66693e-07	44.2068	7.92939	58.971	7.32101e-10	62.009	2.00049e-13	0.309852	0.407074	0.000326007	-0.0388671	0.29
tb_ML7_130801a-TT1_1	23.7724	7.25974	22.7303	0.404059	23.5951	0.275573	22.1943	4.53692	17.8766	0.00687633	24.5969	0.318873	0.0895335	0.00349362	0.456559	0.307022	0
tb_ML7_130801a-TT1_2	20.2576	9.51486	26.0156	0.351608	28.624	2.30221e-12	25.0787	12.9835	41.2442	0.000190659	32.0894	1.0175e-11	7.0347e-05	5.99977e-05	0.137476	-0.197051	0.006
tb_ML7_130801a-TT3_1	7.68629	4.02798	5.68791	0.0504795	5.66551	2.43241e-08	6.40077	2.61666	6.07337	0.129031	4.63514	0.000108828	0.00056072	0.665971	0.0516766	-0.121348	0.052
tb_ML7_130801a-TT3_2	19.1146	7.43197	22.7915	0.15528	23.0273	9.01916e-06	25.3153	11.8689	36.4359	0.18147	28.7724	9.44548e-10	2.49426e-09	3.34004e-06	0.00399735	-0.296629	0
tb_ML7_130801a-TT4_1	4.75204	1.78388	4.71164	0.767514	5.52389	0.00877793	6.5964	2.93119	7.86033	0.618168	8.8154	1.92294e-12	4.41019e-07	0.0016266	2.17998e-08	0.0844101	0.144
tb_ML7_130801a-TT4_2	7.0517	4.6301	5.21419	0.111896	6.81333	0.13594	12.2928	8.79683	16.7697	0.0450731	8.28261	0.537591	1.26551e-10	4.60584e-10	0.121071	-0.337289	0
tb_ML7_130802a-TT1_1	40.3113	18.1907	40.6597	3.06861e-08	35.2177	3.64667e-11	35.9033	11.5738	59.2101	1.8959e-18	23.4889	4.10142e-08	4.00845e-06	1.21301e-06	0.000104487	-0.519328	0
tb_ML7_130802a-TT2_1	98.7339	19.1556	112.601	3.1259e-12	90.4716	8.11945e-10	93.2524	12.0182	142.825	3.248e-26	69.1204	7.99316e-11	9.35447e-06	3.09238e-07	3.06463e-05	-0.65416	0
tb_ML7_130802a-TT3_1	14.6036	3.31421	17.6386	6.36264e-08	15.078	0.973966	14.9338	3.71334	22.5707	1.95288e-12	11.9755	0.0741861	5.90308e-07	4.05357e-05	0.00226041	-0.498967	0
tb_ML7_130802a-TT3_2	59.972	15.4183	65.0405	1.28447e-10	48.6593	2.78539e-19	54.5044	8.78721	82.5812	5.71272e-22	35.591	4.30441e-14	0.000500889	2.79444e-05	0.000132949	-0.643686	0
tb_ML7_130802a-TT3_3	10.5989	2.89066	11.7705	0.860417	11.0569	0.000972876	11.1066	3.24308	15.9464	5.25217e-06	9.97224	0.0440084	0.0155606	6.83336e-06	0.152563	-0.368066	0
tb_ML7_130802a-TT4_1	98.8772	21.3685	107.739	1.01383e-11	84.1022	2.71202e-19	93.0442	13.4036	130.968	7.61289e-25	65.8723	5.28314e-14	6.43072e-05	2.03757e-05	0.000149108	-0.660799	0
tb_ML7_130803a-TT1_1	20.9765	12.014	19.7826	2.55671e-05	12.0946	7.47855e-14	15.5542	8.39124	27.1458	8.65851e-14	8.21804	1.11877e-12	0.386749	0.00394686	0.0437968	-0.614663	0
tb_ML7_130803a-TT1_2	5.74217	2.24447	7.19695	0.0143909	7.70176	3.36393e-09	5.31904	1.934	6.98718	0.0306397	6.55736	8.61879e-06	0.961659	0.787614	0.0880492	0.0217214	0.366
tb_ML7_130803a-TT2_1	20.1869	8.54559	19.268	3.92307e-07	13.1613	3.18863e-17	20.4471	5.09931	35.6884	3.39535e-17	10.3835	3.07408e-16	1.71141e-06	1.83678e-10	0.110296	-0.591195	0
tb_ML7_130803a-TT3_1	10.18	4.20984	9.2853	0.000126508	6.87025	2.33101e-15	9.63977	2.63128	16.0334	1.77905e-14	5.554	1.04983e-13	0.000226752	4.54845e-08	0.131743	-0.544666	0
tb_ML7_130803a-TT3_2	12.289	4.65387	11.0368	0.000213207	9.75598	1.28155e-11	12.5011	2.95646	19.4965	3.36913e-13	8.22761	1.11576e-11	6.48376e-07	1.7367e-09	0.128366	-0.453354	0
tb_ML7_130803a-TT4_1	18.8167	8.03201	17.8923	3.7621e-07	12.6358	1.24918e-17	18.2825	4.91233	29.1351	6.06997e-18	8.6628	1.50685e-21	0.00297502	6.50369e-08	0.00594612	-0.618157	0
tb_ML7_130805a-TT1_2	36.152	13.226	67.2639	5.98038e-19	68.7853	1.10855e-26	37.2028	11.5327	57.9612	5.06749e-15	75.7586	1.05949e-12	0.0374018	0.00819643	0.121217	0.221743	0.004
tb_ML7_130805a-TT1_3	24.2398	9.51399	50.8083	1.43711e-23	52.3916	2.33558e-24	22.2531	8.27023	49.0342	1.29715e-19	47.6285	6.59575e-14	0.0920866	0.519771	0.183117	0.0190738	0.398
tb_ML7_130805a-TT3_1	19.0374	4.16636	17.691	1.87425e-06	16.5817	0.175581	19.5414	4.57886	18.2073	0.000330049	16.1892	0.39355	0.571541	0.58387	0.754309	-0.143171	0.024
tb_ML7_130805a-TT3_2	35.5488	11.0761	31.8621	0.0967514	33.1271	5.57469e-05	50.3665	31.5195	33.7639	0.659344	67.4241	1.32318e-07	0.0453274	0.237047	6.79711e-17	0.315463	0
tb_ML7_130805a-TT4_2	52.7376	16.5128	97.9472	5.13987e-19	95.1317	3.07075e-22	63.2582	25.4159	86.6519	4.89733e-16	117.908	2.69482e-09	0.405087	0.0246807	0.000759655	0.174333	0.006
tb_ML7_130807a-TT1_1	31.0701	10.5865	39.2469	8.34186e-13	28.7028	4.41248e-05	24.3292	11.1652	27.4951	2.56477e-12	25.8627	0.00644884	0.000225955	2.52554e-05	0.201866	-0.246077	0
tb_ML7_130807a-TT1_2	25.4575	10.4885	21.7476	0.321825	27.3569	0.369032	18.7336	5.73514	18.977	1.09052e-05	17.6632	1.18662e-07	0.000117551	0.0743634	4.47342e-09	0.0950568	0.086
tb_ML7_130807a-TT2_1	66.27	18.1556	66.5248	0.00491292	77.4628	0.00105121	60.4643	15.8065	55.3463	0.00102041	71.0031	0.368237	3.77028e-05	0.00206354	0.0707679	0.372516	0
tb_ML7_130807a-TT3_2	62.1513	18.7685	90.7122	5.34321e-22	88.9832	6.48662e-18	50.2784	13.9012	71.9562	1.45592e-26	77.604	1.99531e-23	0.00177493	1.56836e-05	0.000572076	0.0529429	0.224
tb_ML7_130808a-TT1_1	35.0085	14.7499	25.3611	7.91637e-11	23.1962	0.000423753	36.1777	15.794	22.2118	1.59669e-13	23.5487	0.072434	0.760307	0.0688579	0.877158	-0.0197267	0.414
tb_ML7_130808a-TT1_2	95.6954	28.1706	152.648	2.85108e-18	156.622	2.17917e-22	90.5952	28.8488	152.545	2.7609e-22	102.69	8.13097e-09	0.244949	0.984959	1.61888e-10	-0.187808	0.004
tb_ML7_130808a-TT2_1	208.834	42.3788	253.425	1.23911e-14	261.344	1.32962e-12	202.95	45.1489	258.623	2.40889e-15	225.073	0.00091819	0.708331	0.464244	0.00354506	-0.0313687	0.364
tb_ML7_130808a-TT3_1	28.7405	7.82873	38.2102	9.12659e-12	40.8705	5.418e-16	32.8525	8.33499	39.8357	1.39371e-08	43.108	0.000353389	0.0226204	0.345557	0.343045	0.162665	0.02
tb_ML7_130808a-TT3_2	102.809	25.6055	115.162	0.0303117	120.796	4.35574e-05	102.604	27.7997	126.184	1.42165e-06	71.4642	0.0451339	0.546559	0.0710358	5.07638e-09	-0.232274	0.002
tb_ML7_130808a-TT4_1	163.759	48.2186	250.475	6.86612e-22	244.849	1.50435e-22	151.209	52.1452	253.777	6.72671e-26	194.536	2.29151e-11	0.0719781	0.6703	1.33031e-05	-0.228636	0
tb_ML7_130809a-TT1_2	51.8374	10.4715	52.9561	0.00334657	49.683	0.0947477	46.6629	10.8238	47.995	0.000957321	38.2866	0.235941	0.000418648	0.00471229	3.41359e-05	-0.253859	0.002
tb_ML7_130809a-TT1_3	26.5598	10.1886	22.8761	0.365368	22.1364	0.000421283	21.5644	7.93358	20.5279	0.402111	15.7257	0.0555926	0.0920324	0.251317	0.0234883	-0.0955419	0.112
tb_ML7_130809a-TT1_4	33.382	10.9995	37.8612	4.13097e-12	45.7141	1.58985e-06	27.3827	6.50846	40.4014	1.12206e-19	31.7999	1.0624e-05	0.6745	0.204777	2.09355e-06	0.0340265	0.344
tb_ML7_130809a-TT3_1	42.3831	11.0956	53.173	2.48367e-16	48.0025	0.040911	40.437	7.79551	55.081	4.16154e-18	47.3268	0.169181	0.10914	0.365888	0.819785	-0.285444	0
tb_ML7_130809a-TT3_2	18.3376	10.8953	26.035	8.5562e-11	33.1328	4.96815e-13	11.8477	6.26138	22.7619	2.25223e-15	9.52118	0.000150082	0.059923	0.194355	2.3433e-10	-0.0092155	0.478
tb_ML7_130809a-TT3_3	17.5976	11.2579	18.0692	1.00275e-05	11.6826	3.04685e-09	15.097	9.54199	24.5216	3.05601e-14	13.244	0.000906622	0.183457	0.00580105	0.477772	-0.410759	0
tb_ML7_130809a-TT4_1	19.1462	5.18023	21.8002	0.00142832	19.9489	0.158163	15.9027	5.72045	16.2228	0.290772	21.3366	0.000466798	3.23204e-05	6.33041e-05	0.417178	0.106411	0.09
tb_ML7_130809a-TT4_3	5.76224	1.87067	6.0821	0.621732	6.2805	0.00233242	6.62553	1.93744	7.15707	0.135577	9.72867	1.44935e-05	0.250252	0.0436114	3.6699e-05	0.0911311	0.124
tb_ML7_130810a-TT1_1	17.9072	4.73275	10.6595	7.20649e-13	10.2639	2.02612e-09	17.198	4.07398	9.29416	1.5613e-12	6.57511	0.00425641	0.26348	0.289202	0.169185	0.0196241	0.446
tb_ML7_130810a-TT1_2	49.4665	12.239	43.7124	0.611237	51.7364	0.000365239	46.9213	9.61654	46.0838	0.992047	49.1198	0.115624	0.261086	0.306527	0.621939	0.291045	0
tb_ML7_130810a-TT3_1	72.9093	17.0347	83.2656	5.02452e-14	79.201	0.198134	70.884	10.608	104.283	3.42577e-21	80.8309	0.904481	0.207097	1.51506e-08	0.821278	-0.337479	0
tb_ML7_130810a-TT3_2	49.8742	18.448	68.9813	1.81125e-31	68.3138	0.0175744	43.5219	14.7525	68.1845	3.54142e-27	77.76	0.93407	0.107737	0.791044	0.307139	0.064953	0.264
tb_ML7_130810a-TT3_3	52.991	14.6364	64.3017	1.13705e-21	65.3622	0.926594	45.6925	8.88713	68.9344	3.82015e-22	62.2016	0.958983	0.0894224	0.110675	0.651712	-0.0812604	0.19
tb_ML7_130810a-TT4_1	14.7725	3.84924	19.6208	1.62443e-16	19.2748	0.000496226	12.1278	4.76827	14.3026	1.15194e-07	18.0689	0.646675	6.47559e-05	2.31145e-07	0.699622	0.139442	0.056
tb_ML7_130810a-TT4_2	24.3832	13.6666	32.1364	6.24566e-22	31.6701	0.00349975	17.276	7.93677	25.2332	1.72643e-19	34.8283	0.135517	6.4731e-05	0.00151059	0.612159	0.0967385	0.166
tb_ML5_130816a-TT1_1	41.9725	6.59682	39.0296	0.000724359	38.5121	1.61523e-10	38.4202	8.00899	37.5852	0.389446	38.0835	0.0725354	5.23704e-06	0.288165	0.733113	-0.0345897	0.306
tb_ML5_130816a-TT2_1	15.184	4.52489	14.1673	1.18641e-06	17.8548	1.30718e-15	16.0905	4.94378	18.5291	0.567245	17.3087	6.37388e-07	0.0592653	4.95057e-06	0.592831	0.129726	0.02
tb_ML5_130816a-TT2_2	6.89911	2.04021	6.1534	0.021719	7.35687	0.111227	7.09812	2.61655	9.21767	0.0124743	7.62953	0.000168529	0.00242445	3.5741e-07	0.633852	-0.00519757	0.498
tb_ML5_130816a-TT3_1	19.2942	3.49132	19.2626	0.300734	22.3507	3.77612e-15	18.049	4.64021	18.0024	0.169477	21.0458	2.74515e-06	0.344725	0.161818	0.146068	0.322705	0
tb_ML5_130816a-TT3_2	19.7632	5.19304	19.9866	0.0255144	25.3303	1.05145e-30	19.4533	5.95543	23.5949	0.0234844	23.808	1.08098e-16	0.721211	0.000639987	0.184685	0.265593	0
tb_ML5_130817a-TT1_1	61.5966	11.7073	86.5243	1.64253e-09	87.2127	4.31942e-25	59.9936	12.1196	84.7495	0.000143114	75.5952	8.76058e-16	0.0102954	0.77035	8.8338e-07	-0.196071	0.028
tb_ML5_130817a-TT2_1	39.4394	10.2002	37.9003	0.907748	48.9942	5.71698e-10	37.1268	8.91229	27.526	0.204227	46.8115	3.7953e-06	0.00211767	0.00101657	0.305006	0.518987	0
tb_ML5_130817a-TT3_1	19.055	6.41845	19.5556	0.0967764	29.7859	1.97054e-25	16.9201	7.88678	11.7529	0.0235473	22.087	2.75118e-06	0.00195233	0.00709305	2.22685e-07	0.462816	0
tb_ML5_130817a-TT3_2	15.1288	4.80652	14.1108	0.89729	20.0251	1.03282e-11	13.9465	3.84429	11.2268	0.201992	19.1989	1.09101e-09	0.0029243	0.121111	0.451491	0.481936	0
tb_ML5_130819a-TT1_1	30.2534	5.30835	29.4557	0.0820531	32.2793	3.0424e-05	31.5493	5.59615	29.2664	0.0409629	32.3704	0.392987	0.742865	0.88426	0.943478	0.192204	0.002
tb_ML5_130819a-TT2_1	12.4133	5.92488	12.4483	0.329642	15.1938	2.18404e-16	16.36	4.41956	14.587	0.385203	22.2108	2.19933e-11	0.285698	0.0666701	1.26568e-09	0.246069	0
tb_ML5_130819a-TT3_1	31.1717	11.0374	19.459	8.67203e-21	20.4619	1.53544e-26	32.384	10.3103	20.9548	2.09385e-13	20.776	2.38062e-11	0.655634	0.233299	0.761814	0.030242	0.322
tb_ML5_130819a-TT3_2	6.60296	2.80336	6.46668	0.819687	9.89862	6.90021e-25	7.67913	2.37301	6.04431	0.987172	13.5406	1.30951e-13	0.384125	0.490916	1.04186e-06	0.512204	0
tb_ML5_130819a-TT4_2	9.45744	6.20482	17.5639	6.71853e-16	20.2662	8.85233e-40	14.34	6.5407	20.1056	3.81325e-14	35.6701	5.99192e-21	0.0430428	0.187149	1.44052e-14	0.195239	0
tb_ML5_130820a-TT1_1	27.3075	5.11814	28.1259	0.381118	31.2053	9.63701e-09	24.0083	8.85959	29.6381	0.00272041	20.5424	0.000519765	0.0329012	0.33959	1.55539e-18	-0.228684	0
tb_ML5_130820a-TT2_1	10.35	4.77714	12.0052	0.78607	14.9059	1.6349e-16	5.8125	5.26175	9.57924	0.012679	4.35657	9.8183e-14	0.10788	0.022517	1.14103e-34	-0.160263	0.03
tb_ML5_130820a-TT2_2	10.667	3.03616	12.7718	0.00950197	17.0278	1.48845e-15	7.99017	3.98545	14.5246	2.86242e-08	8.55467	6.65657e-11	0.127674	0.0770275	1.24375e-16	-0.200415	0.002
tb_ML5_130820a-TT3_1	22.6111	6.08952	20.3585	0.000158958	23.2644	0.000257932	23.3739	5.63063	19.7319	2.11532e-12	19.9917	0.0541021	0.714368	0.600062	0.00172534	0.118438	0.056
tb_ML5_130820a-TT3_2	14.9343	5.81583	16.2736	0.544212	22.801	1.04452e-22	9.21904	6.00964	14.451	0.407342	9.6734	4.46177e-19	0.0754667	0.116118	1.38123e-38	0.00634591	0.498
tb_ML5_130820a-TT4_2	9.88006	2.77314	13.3902	0.0199797	14.6088	2.12399e-22	9.95007	3.91764	14.145	0.0399843	13.5516	1.69252e-24	0.00249115	0.417986	0.122681	0.0373832	0.306
tb_ML5_130821a-TT1_1	39.9098	6.80013	42.0335	0.730948	45.2693	1.48646e-13	40.0981	6.24739	43.0843	0.0438736	53.2895	6.05037e-19	0.649651	0.511971	1.31642e-08	0.270454	0
tb_ML5_130821a-TT2_1	5.36389	3.27444	6.3837	0.358535	8.09416	1.09892e-24	6.57272	2.47178	5.68758	6.29056e-05	11.155	1.05972e-13	0.421483	0.310311	0.000120367	0.284393	0
tb_ML5_130821a-TT3_1	5.64891	3.44927	6.18075	0.0111882	7.33265	9.75139e-17	7.58214	2.52733	5.6514	4.99437e-10	11.6469	1.13358e-12	0.07817	0.44911	5.46161e-08	0.255485	0
tb_ML5_130821a-TT4_1	58.4396	14.7306	49.0159	2.59209e-07	64.4281	0.000217987	69.1814	8.83075	63.3032	0.110487	84.8635	1.98441e-11	3.79556e-07	8.56707e-10	2.57024e-13	0.575496	0
tb_ML5_130822a-TT1_2	43.1955	5.95404	40.8018	1.88262e-05	41.8125	0.226427	42.3231	5.10435	45.0956	0.98362	40.5645	0.416738	0.270417	0.00182029	0.278259	-0.0621872	0.134
tb_ML5_130822a-TT2_1	12.9935	7.06888	14.436	0.0444369	21.0728	9.21919e-29	11.9283	2.82611	13.4031	0.422107	21.6078	5.6174e-22	0.64905	0.449497	0.743266	0.443278	0
tb_ML5_130822a-TT3_1	25.1822	6.9044	23.1303	6.47679e-10	22.8963	0.639452	23.4273	5.9855	30.3111	0.0875762	20.021	0.312333	0.184831	5.03978e-07	0.0103412	-0.226132	0
tb_ML5_130822a-TT3_2	11.9104	4.53283	13.5545	0.352266	15.3847	3.19974e-19	13.1676	2.95512	13.2622	0.547225	21.6072	9.68862e-19	0.518113	0.746644	1.52478e-10	0.317411	0
tb_ML5_130822a-TT4_1	54.1891	15.4475	46.7254	0.00628016	59.7347	0.0180003	65.4759	8.20875	59.152	0.521321	80.7612	7.18003e-17	8.44811e-06	1.79592e-07	1.73123e-13	0.519207	0
tb_ML5_130823a-TT1_1	82.7055	7.52245	79.472	0.00347183	82.8091	0.730971	78.7413	6.12964	77.2822	0.378859	79.0574	0.950881	6.47155e-05	0.317037	0.0620054	0.134268	0.02
tb_ML5_130823a-TT2_1	10.5216	5.06976	5.40836	0.211165	15.2798	0.173657	10.6763	4.66301	7.42396	0.0547256	16.6339	0.0144561	0.0299977	0.00245927	0.129686	0.8483	0
tb_ML5_130823a-TT2_2	7.5026	2.30985	7.68991	0.150734	11.4937	4.3892e-14	7.93799	3.01633	6.72899	0.432019	14.2424	2.06896e-12	0.0274136	0.137005	0.00336032	0.540242	0
tb_ML5_130823a-TT3_1	13.3341	3.68528	12.7742	0.327198	19.1419	3.49627e-14	13.4	5.26693	10.474	0.252333	24.6866	2.43383e-13	3.80272e-06	0.00593416	7.0768e-05	0.684114	0
tb_ML5_130823a-TT3_2	25.4647	5.25178	25.3132	0.131532	26.1655	0.0247244	23.8829	4.69862	26.0465	0.687337	24.4147	0.000188436	0.858854	0.579604	0.198537	-0.0478774	0.236
tb_ML5_130823a-TT4_1	20.2404	8.04572	21.147	0.735349	22.0074	4.67983e-07	18.1375	5.33972	22.9119	0.0191638	17.5347	6.90948e-07	0.615097	0.18239	0.00150506	-0.171629	0.01
tb_ML5_130826a-TT1_1	55.8064	9.70811	52.1127	0.00888007	50.4529	0.0219282	58.0915	8.62335	54.1345	0.0195384	51.9088	0.0351371	0.497427	0.305003	0.703812	-0.11013	0.122
tb_ML5_130826a-TT2_1	97.4377	19.5307	112.588	2.0373e-08	128.193	1.0222e-14	97.7109	19.8262	119.77	1.07569e-07	101.156	2.07315e-06	0.105904	0.033258	4.75273e-05	0.212694	0.012
tb_ML5_130826a-TT3_1	14.3553	4.36399	15.5009	0.0395449	16.4942	0.00269832	13.8438	4.07612	15.5471	0.0454695	13.7906	0.472416	0.83665	0.967303	0.133454	0.103685	0.122
tb_ML5_130826a-TT3_2	57.5196	10.455	65.2018	3.10152e-06	69.8054	2.23054e-10	63.2158	11.8322	77.9672	9.05748e-06	61.2965	0.00162701	1.22691e-05	1.94861e-07	0.0217058	-0.0683761	0.22
tb_ML5_130826a-TT4_1	15.3516	4.07098	20.9272	2.91912e-12	22.9317	2.69343e-15	15.9861	3.05355	21.3084	5.27419e-10	22.2555	0.00046571	0.761244	0.704747	0.712588	0.191397	0.012
tb_ML5_130826a-TT4_2	42.1839	8.49887	46.443	1.51224e-05	46.5475	0.00384217	42.6361	10.3497	48.3482	0.00530139	33.2135	0.388458	0.0139072	0.246472	0.000195453	-0.177385	0.014
tb_ML5_130826a-TT4_3	16.1754	6.78851	18.9153	2.54181e-14	31.2402	1.33083e-11	14.5453	4.56757	23.9825	1.75869e-17	26.6001	0.0405778	0.114936	0.000131413	0.144515	0.551772	0
tb_ML5_130827a-TT1_1	9.40787	2.87658	15.3763	8.12068e-09	12.0824	1.29085e-10	9.40088	2.3669	15.8345	1.31983e-15	12.7311	2.31087e-10	0.0246179	0.588644	0.434059	-0.415441	0
tb_ML5_130827a-TT1_2	67.9277	7.37442	68.8389	0.791775	67.6269	0.442122	71.7938	10.5596	69.7727	0.91332	70.397	0.0190723	0.660737	0.686149	0.22114	-0.0351539	0.302
tb_ML5_130827a-TT2_2	111.953	9.03522	108.035	0.00925033	117.588	0.00096808	112.971	14.1238	112.078	0.649907	114.464	0.944572	0.593671	0.107933	0.28022	0.220955	0.004
tb_ML5_130827a-TT3_2	21.3415	3.96889	19.9174	0.696926	25.5029	0.000849111	21.4115	4.76922	19.6648	0.635469	25.1983	0.00336146	0.802709	0.844254	0.805068	0.488382	0
tb_ML5_130827a-TT3_3	124.878	10.7136	126.788	0.415862	126.831	0.202785	127.513	13.0798	131.62	0.0326512	131.235	0.237104	0.848471	0.0984867	0.181543	-0.00402984	0.492
tb_ML5_130827a-TT3_4	24.1397	5.97433	22.2878	0.00057177	16.447	3.16714e-08	24.1875	6.77804	24.4664	0.177153	17.1654	1.90251e-06	0.748691	0.210343	0.608616	-0.447398	0
tb_ML5_130827a-TT4_2	105.79	9.64286	107.953	0.165837	122.669	6.48735e-12	110.677	14.1003	114.215	0.0012169	126.821	8.15473e-11	0.884401	0.0102206	0.204118	0.495927	0
tb_ML5_130828a-TT1_2	60.5018	8.62725	69.6519	1.49893e-05	71.5111	3.4054e-15	59.5204	7.97746	63.6204	3.04286e-05	78.8535	6.99639e-12	0.00569311	0.0197542	0.00401654	0.285288	0
tb_ML5_130828a-TT2_1	69.9357	13.8709	71.0166	0.702964	82.4296	4.05383e-14	64.8052	8.98415	64.245	0.0235281	89.2772	2.89534e-14	3.66836e-05	0.0288405	0.0203057	0.493046	0
tb_ML5_130828a-TT3_1	30.1334	13.7018	25.8506	2.67074e-06	17.2818	4.47783e-10	26.9124	10.7029	20.2284	5.48412e-07	13.6596	4.06897e-12	0.1606	0.0291632	0.0177547	-0.354473	0
tb_ML5_130828a-TT3_2	29.7198	6.40247	30.8132	0.121652	34.32	8.97776e-06	26.7448	4.53814	26.4227	0.0411798	34.9953	1.59398e-08	0.000735443	0.0188962	0.688089	0.29606	0
tb_ML5_130828a-TT4_1	18.0287	6.91457	21.7147	1.79705e-10	22.3966	2.61729e-06	17.1699	6.22188	16.38	2.32048e-08	27.7549	1.31193e-08	5.1205e-05	0.000437564	0.0011785	0.291559	0
tb_ML5_130828a-TT4_2	25.5417	7.90705	22.1083	0.00327717	22.3034	7.30853e-11	21.0153	6.92776	20.9295	5.62806e-07	24.9895	0.715446	0.000382192	0.481568	0.0679813	0.13655	0.02
tb_ML5_130829a-TT1_1	11.8755	2.50979	15.2319	1.17114e-10	15.3747	1.44411e-12	12.5024	2.36136	14.9115	0.000135132	15.419	0.000147594	0.225868	0.735183	0.958842	0.0369361	0.262
tb_ML5_130829a-TT2_1	31.2817	5.29979	30.5005	0.00428963	30.211	0.942963	34.0152	4.96793	32.8905	0.000601366	32.4125	0.243558	5.01473e-06	0.112463	0.145918	-0.0318632	0.298
tb_ML5_130829a-TT3_1	86.4448	27.0579	75.5457	9.65144e-08	58.9052	8.92977e-11	76.9937	20.1965	63.0226	2.75435e-06	58.147	0.000421108	0.00274728	0.0135918	0.835297	-0.232266	0
tb_ML5_130829a-TT4_1	22.6242	4.45005	21.9064	0.200682	19.5729	0.000311596	22.9026	4.57641	21.5946	0.314755	19.6509	0.000157548	0.713298	0.82787	0.953307	-0.153404	0.02
tb_ML5_130830a-TT1_1	33.0294	5.98124	39.9485	4.85051e-09	44.6393	2.0723e-16	34.163	5.89262	39.8098	2.38096e-06	47.3598	3.38537e-15	0.010777	0.950461	0.0893086	0.365835	0
tb_ML5_130830a-TT2_1	82.8548	11.5776	83.051	0.139172	67.1586	1.05127e-08	90.0963	14.6779	88.9556	0.401964	77.2753	7.95855e-09	0.0615578	0.28279	0.00119084	-0.358269	0
tb_ML5_130830a-TT3_2	139.848	25.3416	140.292	0.0255924	98.9308	2.79285e-14	149.629	35.0004	140.565	0.0018572	108.418	4.63335e-13	0.00461486	0.975968	0.0432421	-0.583866	0
tb_ML5_130830a-TT4_1	36.0689	8.28672	52.947	2.01825e-19	59.1984	1.50096e-24	34.2285	8.59044	46.2168	4.06677e-10	56.7112	4.1608e-29	0.00110197	0.0283068	0.235656	0.34399	0
tb_ML5_130830a-TT4_2	56.9958	9.28488	59.3336	0.500292	46.5722	2.31097e-06	60.795	11.1808	57.3919	0.086134	54.5335	0.00133761	0.241615	0.660964	0.000915713	-0.261616	0.002
tb_ML5_130903a-TT1_1	64.9788	10.7113	85.4937	5.39304e-05	80.4035	1.55468e-17	65.1366	8.11854	90.7143	0.428407	88.9408	3.25213e-19	0.0704093	0.504515	0.00262774	-0.0495238	0.34
tb_ML5_130903a-TT1_2	5.87737	1.97211	5.28558	0.136732	7.96663	8.18595e-06	7.38266	2.0439	9.27923	0.831928	8.62401	0.000218903	5.01016e-06	0.012902	0.239035	0.475429	0
tb_ML5_130903a-TT2_1	22.3534	3.30999	17.7297	0.000459265	22.7816	0.554378	23.4654	3.16149	16.0894	0.17702	24.9714	0.0893534	0.903344	0.566965	0.0544486	0.535238	0
tb_ML5_130903a-TT3_1	10.7004	3.8098	5.97487	4.4979e-05	6.13924	5.17683e-16	9.14039	2.66117	4.35398	0.251903	6.0236	1.11677e-11	0.00977492	0.452799	0.853954	0.0826667	0.23
tb_ML5_130903a-TT3_2	59.8493	31.5126	53.7617	2.94277e-08	37.4671	0.00965953	50.0261	27.6836	79.7127	0.0109503	45.503	0.499456	0.0050597	0.0773291	0.0157164	-0.337524	0
tb_ML5_130903a-TT3_3	22.6948	4.33709	21.0193	0.501963	24.5386	0.434354	26.4966	3.86621	25.1221	0.140131	25.4994	0.339513	6.3357e-08	0.320078	0.408537	0.259619	0.004
tb_ML5_130903a-TT4_1	45.2872	10.86	45.6635	1.58569e-11	55.9906	4.62009e-05	48.9521	4.79291	52.9884	0.221128	51.412	0.0429533	0.0010171	0.212282	0.00693348	0.436762	0
tb_ML5_130904a-TT1_1	35.027	25.0511	35.5602	1.03787e-18	34.6406	2.1707e-17	50.1951	24.6904	58.1942	8.42503e-22	47.5526	7.31682e-17	4.91669e-12	3.63621e-09	0.000205585	-0.161536	0.006
tb_ML5_130904a-TT1_2	34.845	7.76766	35.6706	0.0926952	34.1314	0.0860066	32.4902	5.26606	31.0077	0.306623	30.7468	0.0194603	1.49694e-05	0.00706259	0.0196038	-0.0673257	0.136
tb_ML5_130904a-TT2_1	15.9628	3.64698	13.4308	1.48882e-06	20.0979	7.9767e-17	17.3999	3.96978	16.6233	0.000442711	20.2813	1.02195e-07	8.17123e-08	0.000277871	0.84862	0.502371	0
tb_ML5_130904a-TT2_2	15.029	2.68019	13.5501	0.0122633	17.2311	1.3995e-05	14.9068	2.6428	13.6753	0.0232194	15.2255	0.500011	0.334259	0.875621	0.0199013	0.318294	0
tb_ML5_130904a-TT3_1	48.8919	8.37945	48.9645	0.000453422	56.2553	6.61234e-07	47.9737	5.19775	45.9512	0.836819	53.8203	3.1725e-05	0.366947	0.132511	0.217853	0.347649	0
tb_ML5_130904a-TT3_2	129.631	41.7546	108.052	4.77154e-13	71.1219	5.08387e-26	125.555	30.1295	107.486	1.12074e-05	69.6962	3.0218e-14	0.00690373	0.948829	0.728581	-0.43037	0
tb_ML5_130904a-TT4_1	9.10293	2.39102	9.5558	0.0251437	12.3636	4.92798e-15	9.35684	2.17483	12.0602	0.00033165	10.7981	2.66391e-06	0.000342168	0.00261253	0.0254527	0.178366	0.002
tb_ML5_130904a-TT4_2	70.1364	13.2443	84.2556	1.48462e-25	122.467	1.67492e-67	81.1717	11.5638	104.647	4.92785e-17	124.138	1.59191e-37	1.75244e-15	1.85795e-10	0.610823	0.719577	0
tb_ML5_130905a-TT1_2	14.9015	4.47477	12.5825	1.26384e-11	13.6479	0.0053144	14.4333	4.30007	12.2599	1.31183e-07	13.0206	0.028917	0.187984	0.733995	0.423984	0.121944	0.032
tb_ML5_130905a-TT2_1	20.2018	5.49275	21.4995	0.978713	30.0047	4.5323e-22	20.9038	4.97159	22.6731	0.536141	32.211	8.16554e-17	0.450399	0.424631	0.159811	0.514352	0
tb_ML5_130905a-TT2_2	4.75688	2.20545	3.41645	2.67706e-08	5.03365	0.0546993	3.97562	1.68386	3.28446	0.00411489	4.17302	0.407228	0.00106782	0.742861	0.0735917	0.276574	0
tb_ML5_130905a-TT3_1	18.4587	3.42789	20.701	1.78026e-05	25.05	7.14623e-20	18.3626	3.18862	20.8876	1.59656e-05	25.5504	3.80352e-14	0.572135	0.8584	0.582403	0.399954	0
tb_ML5_130905a-TT4_1	31.4644	11.8728	41.5321	1.93852e-18	58.6814	5.07715e-34	31.4384	12.5915	55.1542	1.43763e-16	42.3321	7.08769e-25	2.67678e-08	6.24874e-07	1.41025e-07	0.111296	0.04
tb_ML5_130905a-TT4_2	11.5419	3.2593	10.0012	2.19676e-08	12.3171	6.17084e-05	10.989	2.59323	9.06025	6.95506e-07	12.0659	0.000958645	0.0133032	0.209544	0.770213	0.303056	0
tb_ML5_130906a-TT2_2	33.6431	11.962	34.0982	2.61897e-08	44.4482	8.20109e-24	32.9406	13.0484	45.3062	0.249892	34.8075	3.48977e-18	0.732186	2.0028e-05	0.000201468	0.0661979	0.156
tb_ML5_130906a-TT3_2	7.01284	1.91809	5.26712	2.73525e-05	6.44416	0.00938919	6.58631	1.81224	5.92019	0.308091	5.24422	0.000468207	0.525769	0.26445	0.0672559	0.0399479	0.238
tb_ML5_130906a-TT3_3	36.8424	7.54207	33.3497	4.86934e-10	31.1879	0.00617617	35.9409	4.86604	33.2387	4.66478e-05	28.2703	2.70042e-07	0.00296961	0.94743	0.0568677	-0.17224	0.014
tb_ML5_130906a-TT4_2	44.8725	8.51886	52.3414	3.20308e-06	70.0433	2.9768e-32	45.1775	10.4109	69.9343	2.97232e-18	61.4709	7.03409e-24	5.52807e-05	2.05851e-11	0.00267766	0.21	0.004
tb_ML10_140317a-TT1_1	21.858	14.5864	20.5469	8.63877e-10	17.3646	2.94596e-05	21.1446	14.4338	18.66	5.49313e-05	21.7975	0.00157185	0.293963	0.287138	0.0336426	-0.106931	0.034
tb_ML10_140317a-TT2_2	19.4647	13.1927	23.7517	2.48079e-05	26.7096	1.29853e-05	16.6025	10.4201	28.4105	1.62389e-06	16.7658	0.00648955	0.776265	0.0497139	0.000898057	-0.11701	0.036
tb_ML10_140317a-TT2_3	4.58056	2.97761	4.74195	0.521025	3.85596	0.561229	3.9341	2.82444	4.83579	0.125735	4.25662	0.587628	0.0199629	0.880406	0.49747	-0.0973151	0.05
tb_ML10_140317a-TT3_1	52.1017	23.9491	59.4529	0.34098	54.2107	5.48886e-05	47.2717	23.5831	57.9415	0.23679	58.7604	0.000582389	0.0256103	0.617935	0.247294	-0.15092	0.014
tb_ML10_140317a-TT4_1	11.8761	5.38701	14.4866	0.340543	11.9849	0.00613997	10.3569	4.97523	13.3253	0.0606438	11.9411	0.0207842	0.000673396	0.249226	0.967938	-0.217066	0
tb_ML10_140318a-TT1_1	20.4736	8.32951	16.6818	6.59192e-33	15.135	0.00257274	18.797	10.4268	14.9384	8.98836e-14	15.3461	9.49773e-06	0.222878	0.0885661	0.888504	-0.111562	0.044
tb_ML10_140318a-TT1_2	27.9171	11.1397	45.5127	9.12961e-35	40.3967	2.67635e-10	24.9397	11.6041	52.4531	6.93246e-15	41.3793	6.3397e-17	0.0632407	0.00438336	0.7913	-0.184456	0
tb_ML10_140318a-TT2_1	12.4606	8.66093	17.228	1.91023e-15	12.4918	0.948539	11.7372	7.1224	17.1427	1.09503e-06	8.91207	0.206126	0.191087	0.957989	0.102476	-0.353699	0
tb_ML10_140318a-TT2_2	17.1528	6.37545	11.8122	1.47246e-52	13.882	4.87985e-05	15.387	7.0341	12.4382	4.07513e-19	14.8076	5.87846e-07	0.401994	0.397248	0.466881	0.215829	0
tb_ML10_140318a-TT3_1	16.3195	5.5153	15.0337	2.54379e-05	11.3468	0.00371761	14.9339	5.93352	15.5529	0.188391	10.9227	0.493641	0.737935	0.557368	0.71667	-0.340007	0
tb_ML10_140318a-TT4_1	41.5837	13.4025	35.0463	4.17486e-21	35.7737	0.565773	33.7438	13.1072	33.3722	9.66671e-06	30.3332	0.00454729	0.0167514	0.282361	0.0518818	-0.048541	0.222
tb_ML10_140319a-TT1_1	78.0388	21.0368	156.278	2.33266e-70	161.54	1.44308e-29	78.423	26.7039	153.728	3.00212e-31	158.159	1.54328e-26	0.00272935	0.606723	0.638639	0.0437664	0.24
tb_ML10_140319a-TT2_1	18.8953	6.28392	20.2504	0.125416	21.078	6.50535e-11	20.1855	7.06684	23.5892	0.0951042	24.4796	1.14572e-11	3.95105e-08	0.00175652	0.0386031	0.0884186	0.062
tb_ML10_140319a-TT2_2	86.1835	15.7429	97.1479	4.88093e-07	101.02	1.34996e-08	84.1479	17.3427	94.1731	0.149299	102.755	4.43783e-07	0.176044	0.374905	0.770703	0.15397	0.004
tb_ML10_140319a-TT3_1	55.1763	12.9236	55.8612	0.000167152	51.63	7.89021e-06	54.6349	14.6289	51.7035	0.283886	54.3254	0.0079554	0.187209	0.0421804	0.328495	-0.0947507	0.066
tb_ML10_140319a-TT4_1	73.4575	17.5224	82.2687	8.26274e-13	72.1427	6.64706e-05	76.2935	23.0297	82.4374	1.36772e-08	77.3494	0.46084	0.0209195	0.960591	0.216762	-0.170702	0.002
tb_ML10_140320a-TT1_1	15.9371	4.22225	20.5244	2.28885e-06	18.6324	0.00085802	17.8492	3.94785	26.6783	4.78766e-08	19.5557	0.0323362	0.000707068	0.000105899	0.478435	-0.242973	0
tb_ML10_140320a-TT1_2	10.7431	9.53247	25.7885	4.26226e-10	25.5103	1.58702e-08	10.9602	7.56978	43.6822	1.14181e-18	14.6382	1.06404e-05	0.580036	1.10528e-05	0.00446912	-0.321093	0
tb_ML10_140320a-TT2_2	79.8333	19.1893	128.775	1.1563e-15	144.175	1.64988e-20	85.8736	17.4304	128.529	5.32919e-11	140.626	6.58893e-10	0.212813	0.977675	0.665339	0.163751	0.002
tb_ML10_140320a-TT3_1	78.887	15.5868	84.6603	0.000742895	80.9443	0.746182	85.738	14.3408	97.4524	6.60919e-07	83.4267	0.0480534	0.0147007	0.000197583	0.455022	-0.261256	0.002
tb_ML10_140320a-TT4_1	72.3514	23.514	105.763	1.91701e-13	97.5494	2.92483e-08	77.3254	19.6658	134.162	2.1806e-17	96.74	0.000189537	0.346763	2.15959e-05	0.889447	-0.301287	0
tb_ML10_140326a-TT2_2	19.8322	9.07718	15.5887	0.00389515	19.6781	0.986047	17.712	7.19872	15.569	0.031569	17.3446	0.593069	0.355196	0.992678	0.3261	0.188021	0.002
tb_ML10_140326a-TT3_1	26.4944	12.248	15.1159	3.07183e-11	19.9853	3.92339e-06	26.3909	13.3388	15.8699	9.61999e-09	18.4056	1.91454e-05	0.936558	0.616307	0.421577	0.197554	0
tb_ML10_140326a-TT4_1	48.2568	15.3523	49.965	0.527727	47.369	0.768894	47.2202	16.0893	49.4455	0.875772	47.8341	0.354051	0.822522	0.842925	0.859639	-0.0615984	0.152
tb_ML10_140328a-TT1_1	22.7728	11.4463	44.3135	5.27214e-11	35.9727	3.87002e-09	20.7313	9.52044	73.8931	4.23951e-19	36.1372	2.08806e-06	0.105069	2.30763e-08	0.95745	-0.415174	0
tb_ML10_140328a-TT2_1	21.1155	10.3715	43.5606	6.89902e-14	41.3168	3.22519e-14	21.9333	9.41386	43.2888	3.38749e-09	48.0462	3.11894e-16	0.944072	0.939176	0.0600815	0.0339532	0.338
tb_ML10_140328a-TT2_2	29.443	16.5881	20.4198	0.00461848	19.912	5.55562e-05	23.4142	9.98249	19.0616	0.0309614	24.8932	0.479621	0.0920224	0.636887	0.100566	0.0891791	0.122
tb_ML10_140328a-TT2_3	15.7578	8.8026	12.6862	0.0313945	11.667	0.00109892	13.6049	6.26014	14.3686	0.927662	15.1313	0.105833	0.438854	0.291752	0.039507	-0.00758706	0.476
tb_ML10_140328a-TT3_1	11.2717	4.51118	10.9688	0.528419	9.48027	0.00122972	12.0978	5.41823	8.44184	0.0909028	10.683	3.17184e-05	0.130269	0.00762404	0.272587	0.000248756	0.496
tb_ML10_140328a-TT4_1	9.0665	6.40069	10.9404	0.00118577	10.2676	0.0599816	7.12625	5.14256	6.18189	0.0245913	11.5941	0.00102766	5.42535e-05	0.000210883	0.31894	0.168346	0.006
tb_ML10_140329a-TT1_1	27.927	11.5876	18.226	1.74246e-19	18.7562	0.000716186	30.4622	11.6502	21.4314	5.53119e-22	13.9965	7.5749e-09	0.000284795	0.0380532	0.00572052	-0.15467	0.016
tb_ML10_140329a-TT1_2	51.5162	27.105	59.0345	0.00651025	66.4886	0.0245676	52.3297	20.2277	61.0921	0.313225	54.209	0.0640502	0.00158432	0.744864	0.118295	0.0299824	0.286
tb_ML10_140329a-TT2_1	48.9071	21.3937	42.6125	0.115761	43.263	0.00499295	54.9769	24.4444	45.2935	0.000212695	39.923	0.00159186	0.00192928	0.441324	0.473623	-0.0488085	0.232
tb_ML10_140329a-TT3_1	40.876	13.6968	30.8865	1.56031e-09	28.884	4.3134e-09	42.2448	12.0797	33.6158	2.01276e-11	23.6941	1.38832e-07	0.0014505	0.256118	0.0235209	-0.158156	0.01
tb_ML10_140329a-TT4_1	101.097	35.3422	85.7003	7.52941e-05	88.7428	0.00665994	108.436	30.9297	98.6448	7.62973e-07	71.4425	6.37966e-05	5.92828e-07	0.0285213	0.00630957	-0.122554	0.036
tb_ML10_140330a-TT2_1	3.38628	2.02834	6.26405	2.17734e-08	5.11481	1.19242e-05	3.7815	1.56932	6.96724	1.14597e-12	8.03959	2.09919e-12	0.209738	0.287607	4.60679e-06	0.0411616	0.314
tb_ML10_140330a-TT2_2	15.4403	10.3762	13.5347	0.052817	12.5739	0.23808	13.2976	10.1193	17.962	0.324491	7.67132	0.000807393	0.684702	0.0190641	0.000752039	-0.334865	0
tb_ML10_140330a-TT4_1	13.171	12.3351	10.9518	0.0156217	11.3161	0.515343	17.8993	14.4889	14.5838	3.666e-06	6.71688	2.08678e-06	6.59517e-07	0.121786	0.0122831	-0.179143	0.004
tb_ML10_140331a-TT1_1	6.09224	3.24379	12.6248	1.6087e-24	10.96	1.33998e-32	6.4497	3.54965	13.63	2.46488e-11	10.1004	5.98268e-13	0.0190522	0.233398	0.297138	-0.206628	0
tb_ML10_140331a-TT1_2	8.11957	6.46917	20.0941	1.25244e-34	22.6919	1.79425e-20	4.48879	4.9152	16.5462	6.82787e-13	5.52241	0.189444	0.0799838	0.111443	4.76231e-10	-0.0464155	0.18
tb_ML10_140331a-TT3_1	23.0605	8.58684	28.3213	4.2821e-06	27.4299	4.08235e-11	23.8894	7.62847	29.6155	0.103438	28.3382	9.5337e-11	0.00485183	0.296422	0.504166	-0.0636248	0.146
tb_ML10_140331a-TT4_1	20.7389	9.56762	28.018	1.09628e-19	28.6999	7.94217e-19	23.5299	8.92504	34.0035	1.05729e-05	28.773	1.51895e-14	5.85045e-08	6.20406e-05	0.963075	-0.0699078	0.096
tb_ML10_140401a-TT1_1	8.98354	4.90821	17.2981	4.69487e-24	16.1555	3.32732e-43	9.58035	3.99457	15.3721	7.77819e-08	16.5253	5.15685e-13	0.814118	0.119243	0.732262	-0.0397521	0.22
tb_ML10_140401a-TT1_2	12.1292	6.6158	21.3348	3.73776e-20	21.7763	9.87238e-30	10.9027	5.54636	15.7208	1.59991e-07	17.163	2.27472e-05	0.132219	0.0011163	0.00493473	0.0649376	0.106
tb_ML10_140401a-TT2_1	47.7152	23.4233	39.5217	2.59662e-06	38.279	8.50042e-07	41.4437	15.7603	34.4237	2.51312e-07	31.5258	0.863811	0.645137	0.244464	0.0587064	-0.0117446	0.406
tb_ML10_140401a-TT3_1	8.90091	5.07881	13.2932	0.000351469	11.2703	1.83445e-20	10.5031	3.70923	10.9677	0.661567	17.16	4.10129e-12	0.683076	0.0265672	1.35861e-09	-0.0186608	0.356
tb_ML10_140401a-TT4_1	10.6231	5.44708	15.7318	3.0471e-06	13.5793	3.27375e-21	11.5516	3.89565	12.7588	0.582645	17.1236	2.70193e-10	0.308334	0.00553663	0.000315047	-0.0353152	0.262
tb_ML10_140402a-TT1_1	19.774	14.6472	56.1338	9.77766e-42	52.5611	1.39596e-47	10.3673	7.40313	28.5864	6.58655e-18	23.484	6.05459e-05	1.04566e-08	4.02053e-08	9.83901e-09	-0.0452976	0.192
tb_ML10_140402a-TT1_2	8.84029	5.56816	13.2851	5.64883e-27	13.0046	0.000981866	7.37356	3.51748	16.2457	2.16359e-12	7.0061	0.00237969	0.767918	0.0566372	2.84869e-05	-0.150822	0
tb_ML10_140402a-TT2_1	61.0977	26.5798	55.551	0.0966394	58.0539	0.0400216	44.7819	13.3285	39.1793	0.960424	58.9499	0.0224135	3.67096e-09	3.4106e-06	0.806009	0.163013	0
tb_ML10_140402a-TT3_1	78.6581	25.1278	61.7682	0.0805901	61.0785	1.15791e-36	85.0493	22.0921	83.0535	7.4989e-05	64.9276	8.62545e-13	0.000277394	9.52242e-11	0.165476	-0.152116	0.002
tb_ML10_140402a-TT4_1	6.80094	2.5088	7.65442	1.58634e-06	6.67168	0.0533205	7.16863	2.30865	8.6759	6.10454e-06	6.21928	0.00044264	0.928779	0.115978	0.475444	-0.190877	0
tb_ML10_140402a-TT4_2	15.6091	12.2058	22.754	1.62199e-19	20.2957	4.59464e-05	8.04046	4.06095	10.1992	1.07483e-10	9.35508	0.179001	1.91973e-06	9.98437e-07	2.60217e-06	-0.0545167	0.142
